# Supplementary material for: Comparative genomics of Campylobacter concisus: Analysis of clinical strains reveals genome diversity and pathogenic potential
Source: PubMed Central journal article supplement (PMC6018663; doi:10.1038/s41426-018-0118-x), 2018-06-26

Tree scale: 0.01

**Colored ranges**

- CD
- Collagenous colitis
- Gastroenteritis
- Bloody diarrhea
- Lymphocytic colitis
- Periodontal disease
- Healthy
- UC

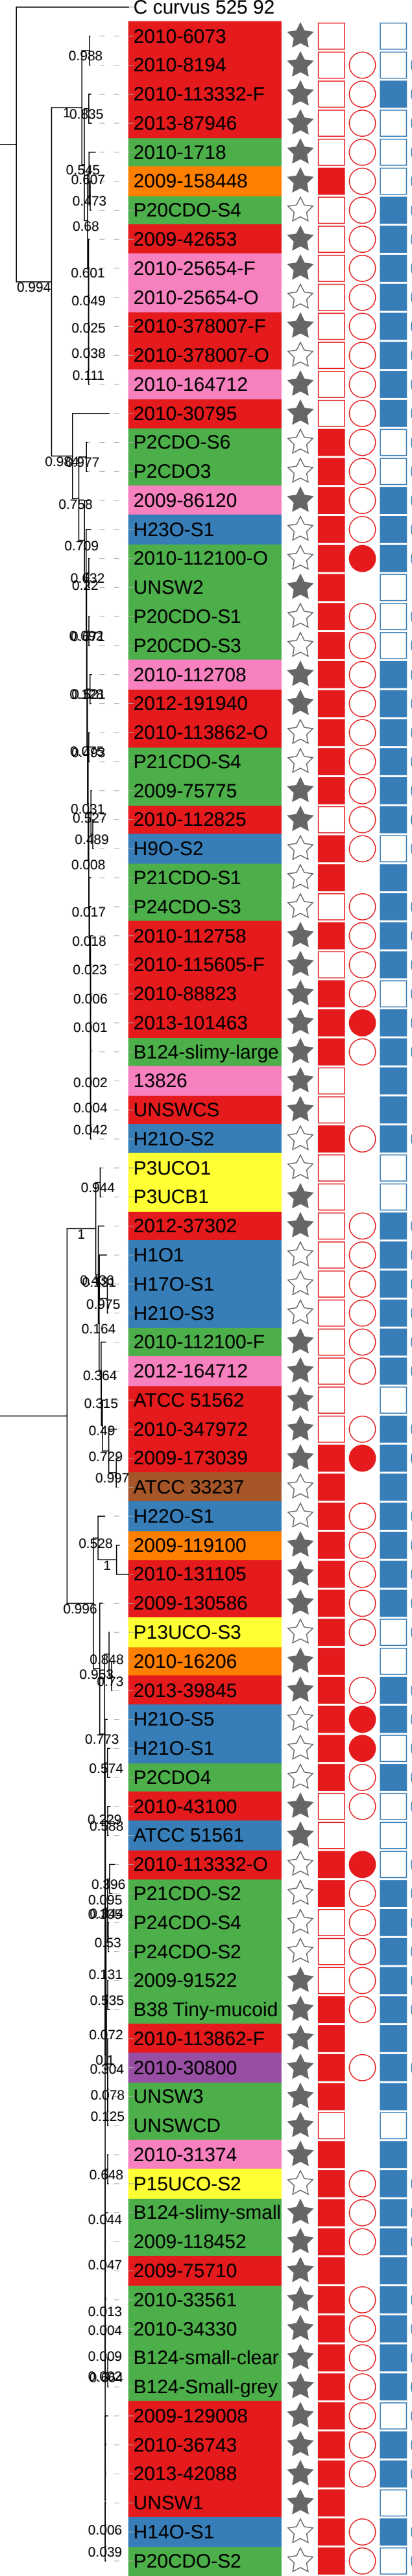

Supplement: 41426_2018_118_MOESM3_ESM.pdf [file 41426_2018_118_MOESM3_ESM.pdf]
