# Supplementary material for: Comparative genomics of Campylobacter concisus: Analysis of clinical strains reveals genome diversity and pathogenic potential
Source: PubMed Central journal article supplement (PMC6018663; doi:10.1038/s41426-018-0118-x), 2018-06-26

# Cellular Processes

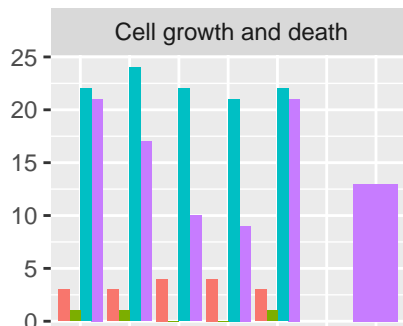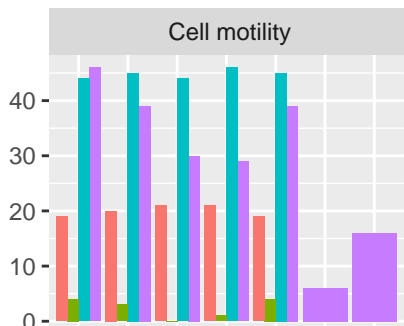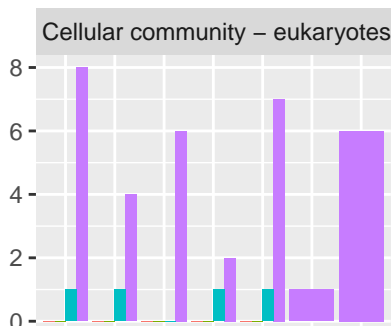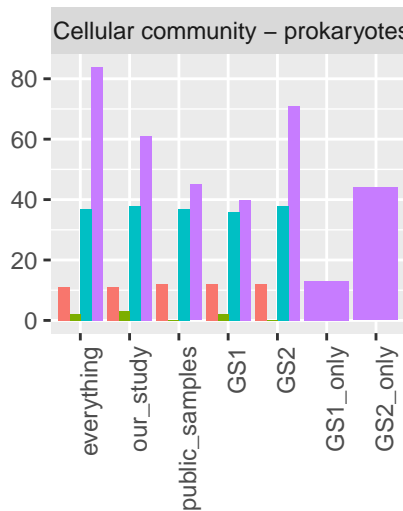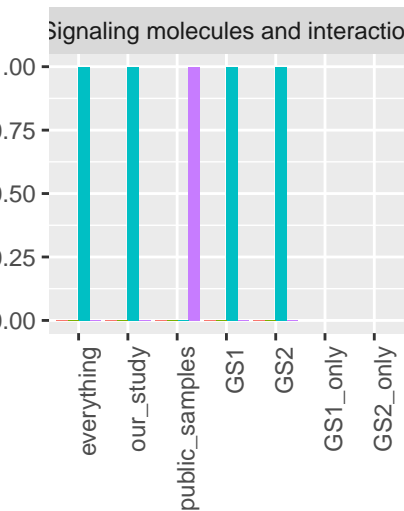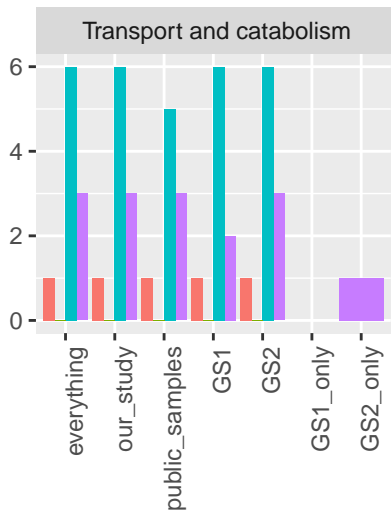

■ pangenome
 ■ Core genes
 ■ Soft core genes
 ■ Shell genes
 ■ Cloud genes

# Environmental Information Processing

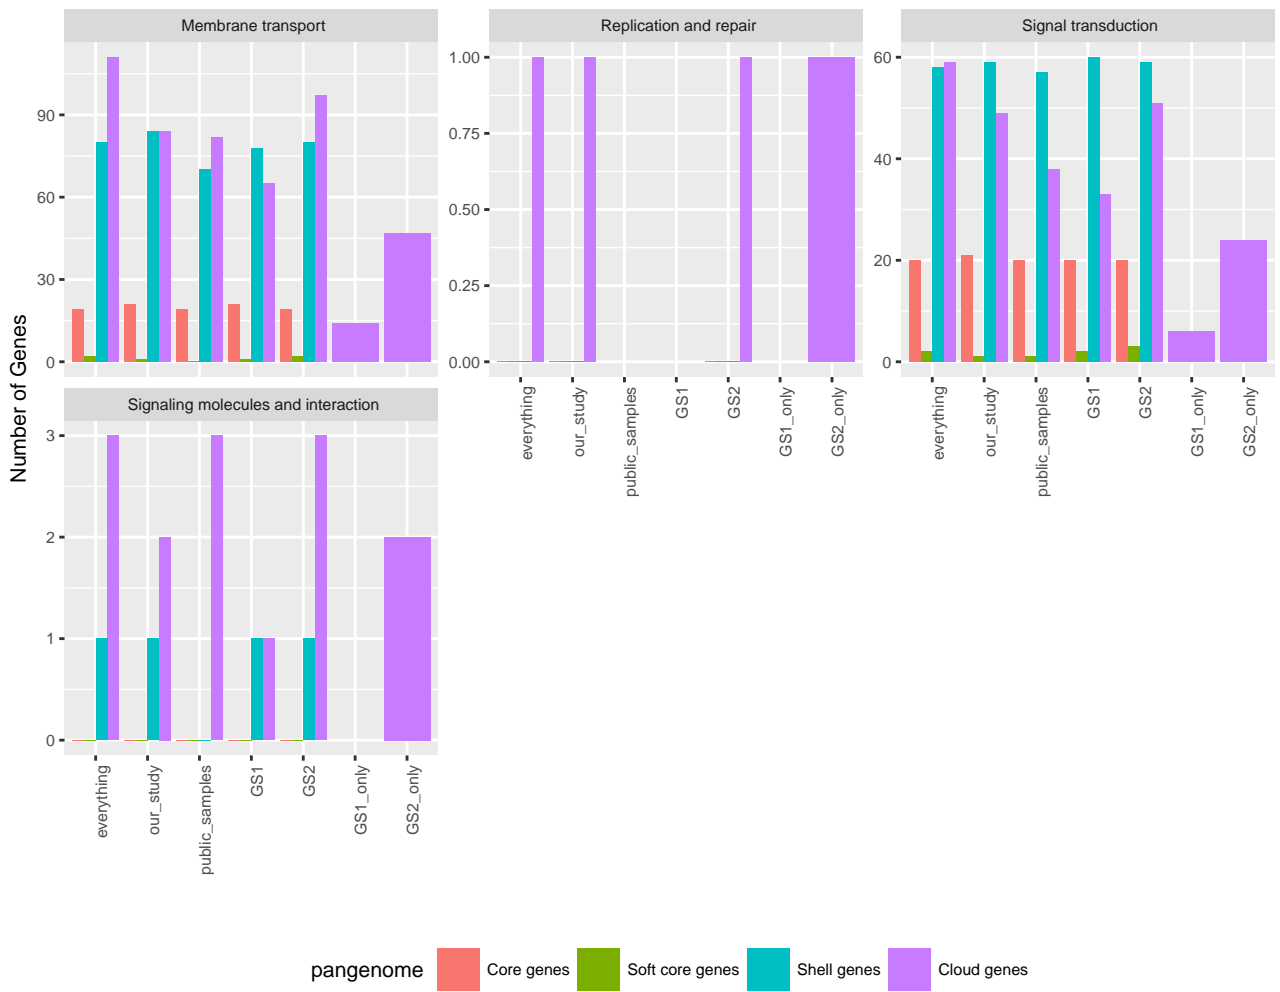

# Genetic Information Processing

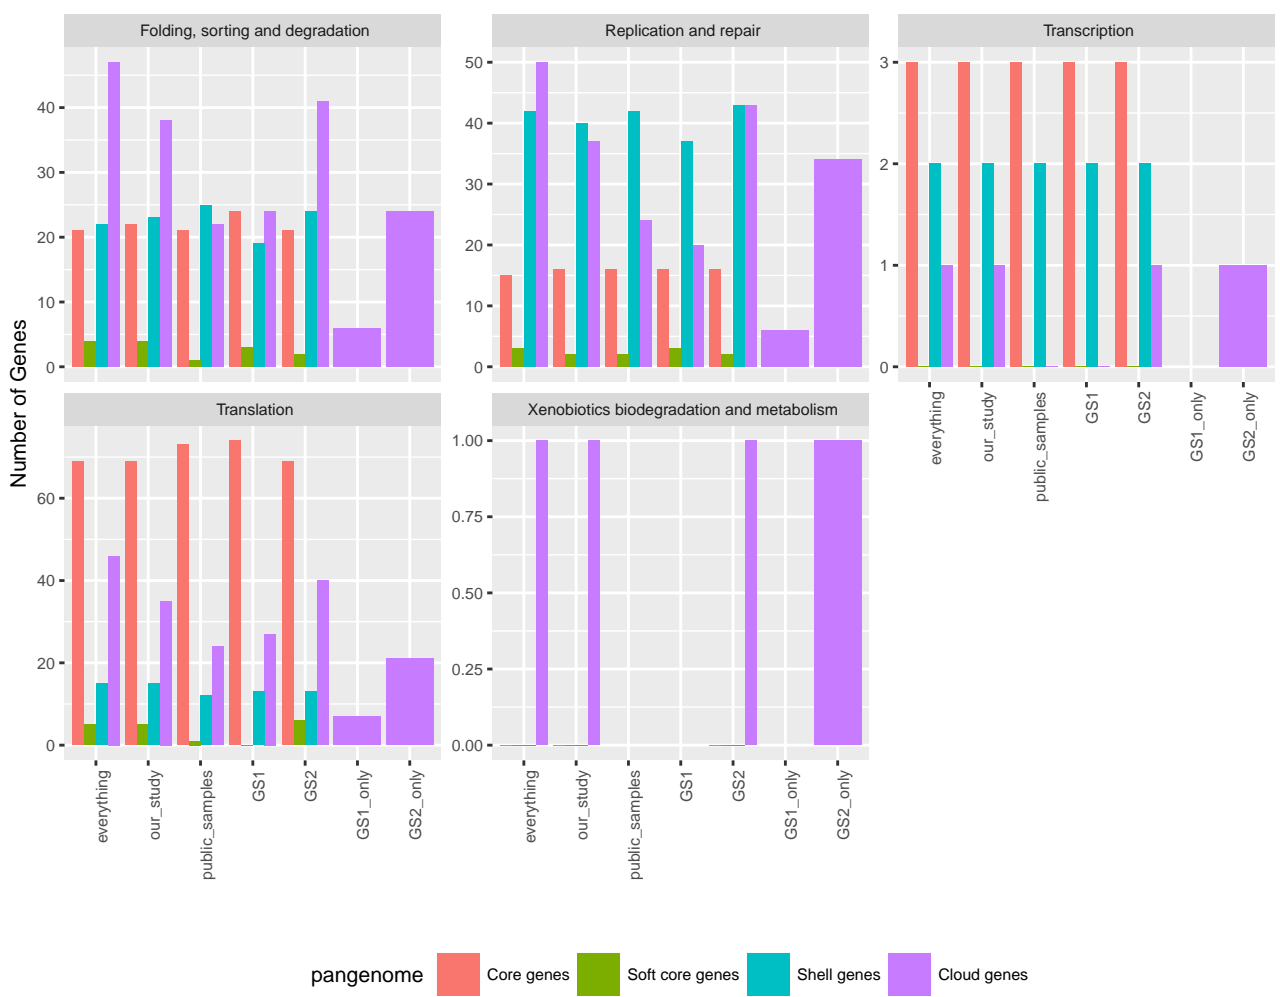

# Human Diseases

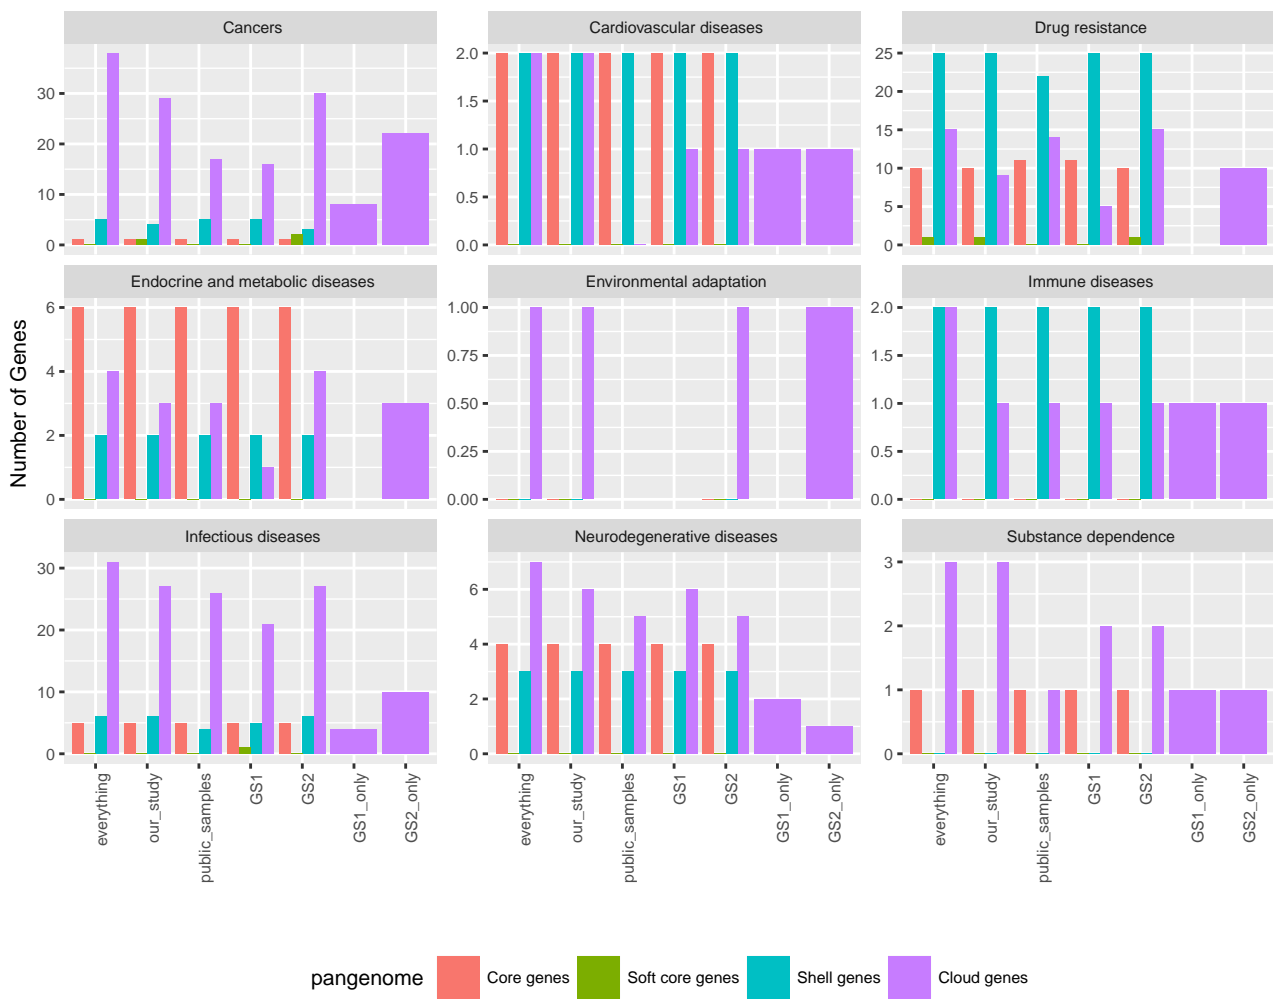

# Metabolism

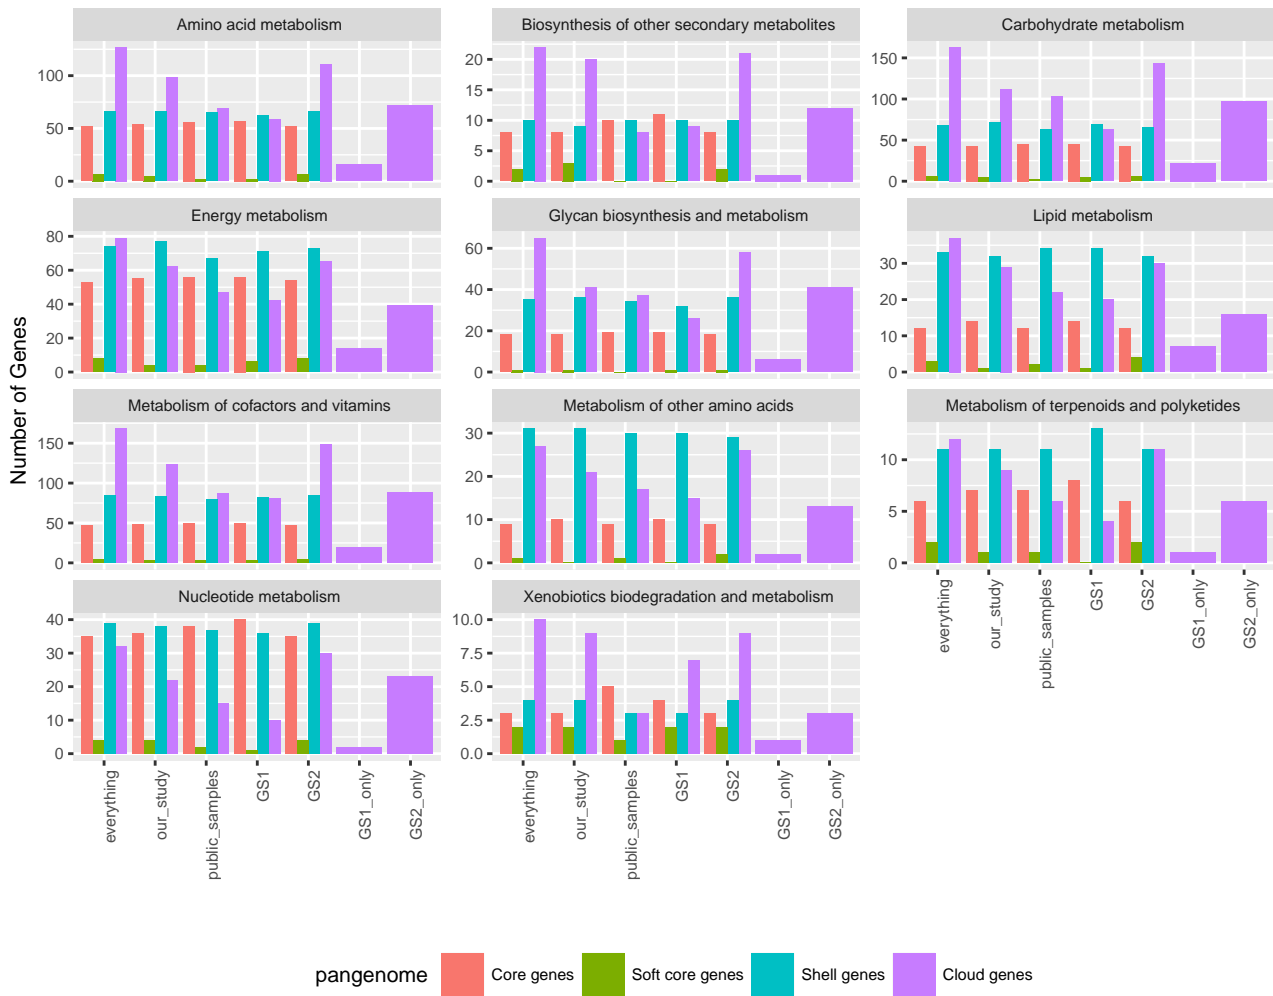

# Organismal Systems

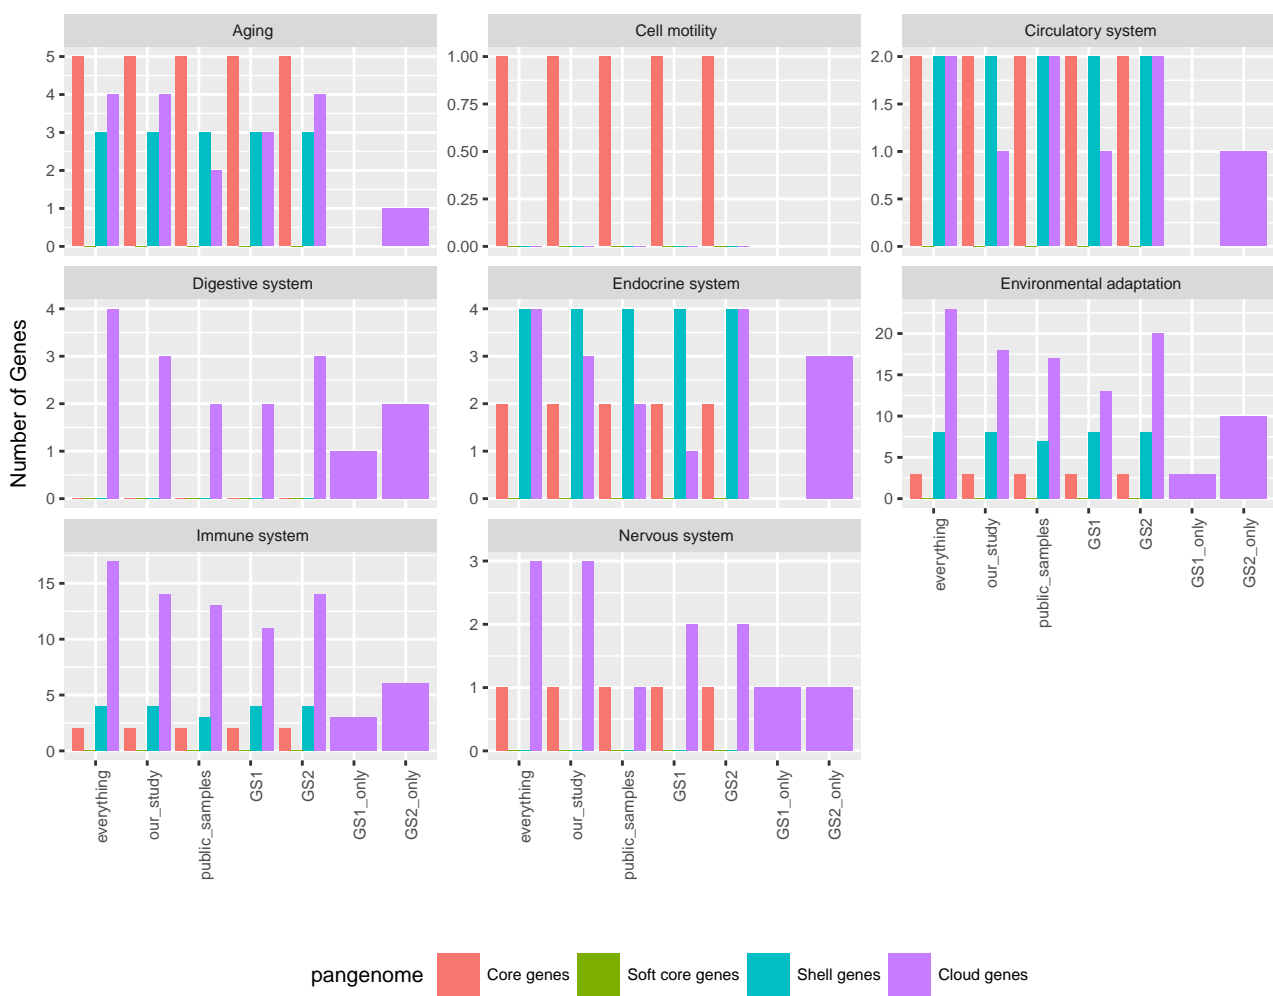

Supplement: 41426_2018_118_MOESM4_ESM.pdf [file 41426_2018_118_MOESM4_ESM.pdf]
