# Supplementary material for: Comparative genomics of Campylobacter concisus: Analysis of clinical strains reveals genome diversity and pathogenic potential
Source: PubMed Central journal article supplement (PMC6018663; doi:10.1038/s41426-018-0118-x), 2018-06-26

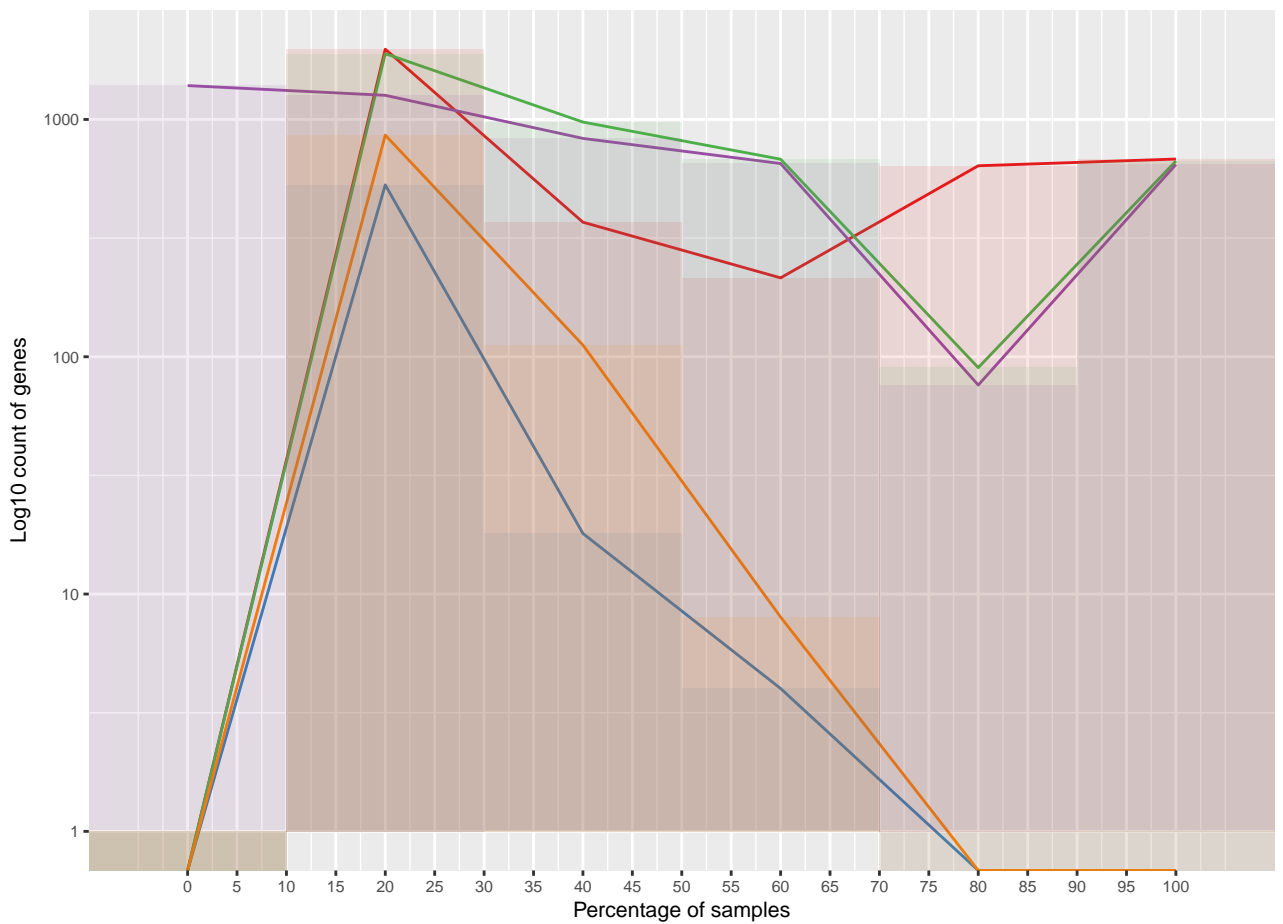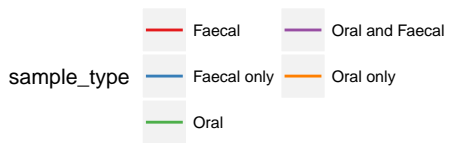

Supplement: 41426_2018_118_MOESM6_ESM.pdf [file 41426_2018_118_MOESM6_ESM.pdf]
